# Supplementary material for: Metal transport mechanism of the cation diffusion facilitator (CDF) protein family – a structural perspective on human CDF (ZnT)-related diseases
Source: Royal Society of Chemistry journal article supplement (doi:10.1039/d0cb00181c), 2021-01-01
Supplement: d0cb00181c1.pdf [file d0cb00181c1.pdf]

**Supplementary information for:**

**Metal transport mechanism of the cation diffusion facilitator (CDF) protein family – structural perspective on human CDF (ZnT)-related diseases**

**Authors:** Shiran Barber-Zucker<sup>1,\*</sup>, Arie Moran<sup>2</sup> and Raz Zarivach<sup>1,\*</sup>

**Authors' affiliation:**

<sup>1</sup> Department of Life Sciences, the National Institute for Biotechnology in the Negev and Ilse Katz Institute for Nanoscale Science and Technology, Ben-Gurion University of the Negev, Beer Sheva, 8410501, Israel

<sup>2</sup> Department of Physiology and Cell Biology, Faculty of Health Sciences, Ben-Gurion University of the Negev, Beer Sheva, 8410501, Israel

\*Correspondence should be addressed to:

Shiran Barber-Zucker, Department of Life Sciences, Ben-Gurion University of the Negev, P.O.B. 653, Beer Sheva 8410501, Israel. Tel: +972-8-6428447, Fax: +972-8-6472970, Email: [barbers@post.bgu.ac.il](mailto:barbers@post.bgu.ac.il), [shiranbarber@gmail.com](mailto:shiranbarber@gmail.com)

Raz Zarivach, Department of Life Sciences, Ben-Gurion University of the Negev, P.O.B. 653, Beer Sheva 8410501, Israel. Tel: +972-8-6461999, Fax: +972-8-6472970, Email: [zarivach@bgu.ac.il](mailto:zarivach@bgu.ac.il)

hZnT1  
TtCzrB  
MgMamM  
hZnT-8  
AtMTP1  
hZnT-10  
EcYiiP  
hZnT-2  
hZnT-3

hZnT1  
MgMamM  
hZnT-8  
AtMTP1  
hZnT-10  
EcYiiP  
hZnT-2  
hZnT-3

hZnT1  
TtCzrB  
MgMamM  
hZnT-8  
AtMTP1  
hZnT-10  
EcYiiP  
hZnT-2  
hZnT-3

hZnT1  
TtCzrB  
MgMamM  
hZnT-8  
AtMTP1  
hZnT-10  
EcYiiP  
hZnT-2  
hZnT-3

hZnT1  
TtCzrB  
MgMamM  
hZnT-8  
AtMTP1  
hZnT-10  
EcYiiP  
hZnT-2  
hZnT-3

hZnT1  
TtCzrB  
MgMamM  
hZnT-8  
AtMTP1  
hZnT-10  
EcYiiP  
hZnT-2  
hZnT-3

hZnT1  
TtCzrB  
MgMamM  
hZnT-8  
AtMTP1  
hZnT-10  
EcYiiP  
hZnT-2  
hZnT-3

hZnT1  
TtCzrB  
MgMamM  
hZnT-8  
AtMTP1  
hZnT-10  
EcYiiP  
hZnT-2  
hZnT-3

hZnT1  
TtCzrB  
MgMamM  
hZnT-8  
AtMTP1  
hZnT-10  
EcYiiP  
hZnT-2  
hZnT-3

← Extended N-terminal  
 ← Extended His-rich loop  
 hZnT-8 TM helices  
 ● A/S<sub>TM</sub> site  
 ● S<sub>IF</sub> site  
 ● B site  
 ● S<sub>CDs</sub> site  
 ● C site

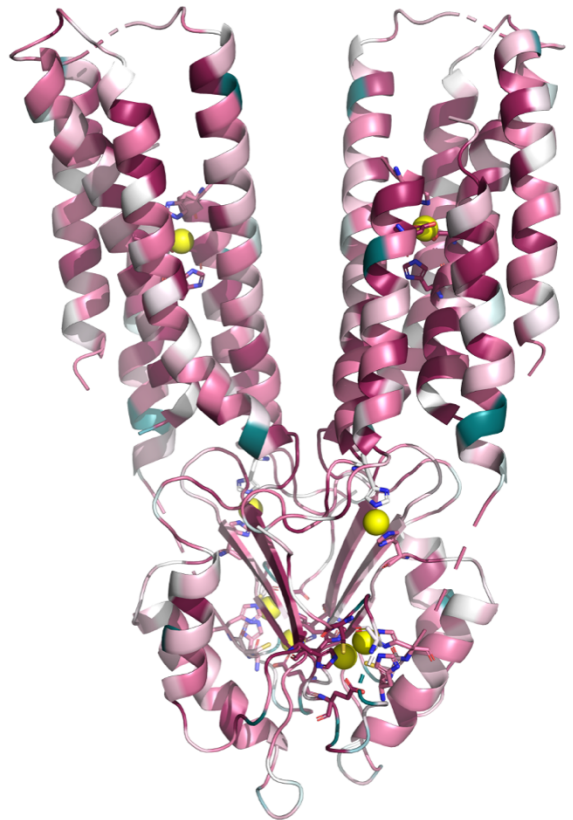

1 2 3 4 5 6 7 8 9  
 Variable Average Conserved  
 ☒ - Insufficient data

**Figure S1.** Sequence conservation between bacterial (*Escherichia coli* YiiP, *Thermus thermophilus* CzcB and *Magnetospirillum gryphiswaldense* MSR-1 MamM), plant (*Arabidopsis thaliana* MTP1) and human (ZnT-1, ZnT-2, ZnT-3, ZnT-8 and ZnT-10) CDF proteins. Multiple sequence alignment was calculated by ClustalO<sup>1</sup>. Conservation scores and colored structure were produced by ConSurf server<sup>2,3</sup> and PyMol version 2.3.5 (Schrödinger, LLC); scale of conservation ranges from dark blue (variable positions) to dark red (highly conserved positions); yellow coded residues refer to incomplete data (calculation for these sites were performed on less than 10% of the sequences). Functional regions are marked as colored arrays, human ZnT-8 transmembrane helices as cylinders and metal binding sites in human ZnT-8 and *E. coli* YiiP as colored spheres. Human ZnT-8 structure (PDB code 6XPE<sup>4</sup>) is presented and colored by ConSurf conservation scores, with metal binding residues presented as sticks and zinc ions in yellow spheres.

### Supplemental references

- 1 F. Sievers, A. Wilm, D. Dineen, T. J. Gibson, K. Karplus, W. Li, R. Lopez, H. McWilliam, M. Remmert, J. Söding, J. D. Thompson and D. G. Higgins, *Mol. Syst. Biol.*, 2011, **7**, 539.
- 2 M. Landau, I. Mayrose, Y. Rosenberg, F. Glaser, E. Martz, T. Pupko and N. Ben-Tal, *Nucleic Acids Res.*, 2005, **33**, W299–W302.
- 3 H. Ashkenazy, S. Abadi, E. Martz, O. Chay, I. Mayrose, T. Pupko and N. Ben-Tal, *Nucleic Acids Res.*, 2016, **44**, W344–W350.
- 4 J. Xue, T. Xie, W. Zeng, Y. Jiang and X. Bai, *Elife*, 2020, **9**, e58823.
